# Supplementary material
Source: HighWire-hosted journal article supplement (https://bmjopen.bmj.com/content/8/8/e023300)
Supplement: inline-supplementary-material-2 [file inline-supplementary-material-2.pdf]

**Ovid MEDLINE(R) Daily and Ovid MEDLINE(R) 1946 to Present**

Search Strategy:

| # | Searches                                                                                                                                                                                                                                                                                                                                                                                                                                                                                                                                                                                                                                                                                                                                                                                          | Results |
|---|---------------------------------------------------------------------------------------------------------------------------------------------------------------------------------------------------------------------------------------------------------------------------------------------------------------------------------------------------------------------------------------------------------------------------------------------------------------------------------------------------------------------------------------------------------------------------------------------------------------------------------------------------------------------------------------------------------------------------------------------------------------------------------------------------|---------|
| 1 | audiovisual aids/ or exp medical illustration/ or Pictogram*.ti,ab,kw. or Pictograph*.ti,ab,kw. or Picture*.ti,ab,kw. or Pictorial.ti,ab,kw. or Image.ti,ab,kw. or Images.ti,ab,kw. or Imagery.ti,ab,kw. or Graphic*.ti,ab,kw. or Infographic*.ti,ab,kw. or Visual representation*.ti,ab,kw. or Visual warning*.ti,ab,kw. or Visual aid*.ti,ab,kw. or Presentation modalit*.ti,ab,kw. [Pictorial concept]                                                                                                                                                                                                                                                                                                                                                                                         | 650278  |
| 2 | exp Patient Education as Topic/ or Health Promotion/mt or Health Communication/ or exp Consumer Health Information/ or Pamphlets/ or Broadsides as topic/ or Posters as topic/ or product packaging/ or exp drug packaging/ or product labeling/ or Health warning*.ti,ab,kw. or Health information.ti,ab,kw. or Patient education.ti,ab,kw. or Visual warning*.ti,ab,kw. or Nutrition label*.ti,ab,kw. or Patient information.ti,ab,kw. or Consumer education.ti,ab,kw. or Consumer health.ti,ab,kw. or Medication information.ti,ab,kw. or Prescription information.ti,ab,kw. or Warning label*.ti,ab,kw. or Health message*.ti,ab,kw. or Decision aid*.ti,ab,kw. or Decision tool*.ti,ab,kw. or Discharge instruction*.ti,ab,kw. or After visit summar*.ti,ab,kw. [Health information concept] | 163558  |
| 3 | 1 and 2 [Pictorial concept AND health info concept]                                                                                                                                                                                                                                                                                                                                                                                                                                                                                                                                                                                                                                                                                                                                               | 4273    |
